# Supplementary material for: The small and large intestine contain transcriptionally related mesenchymal stromal cell subsets that derive from embryonic Gli1+ mesothelial cells
Source: Research Square preprint supplement (doi:10.21203/rs.3.rs-829151/v1), 2021-10-08
Supplement: Supplementary file 1 [file 85b4aff6e81d8eac66bc37c2.pdf]

## Supplemental Information

Figure S1

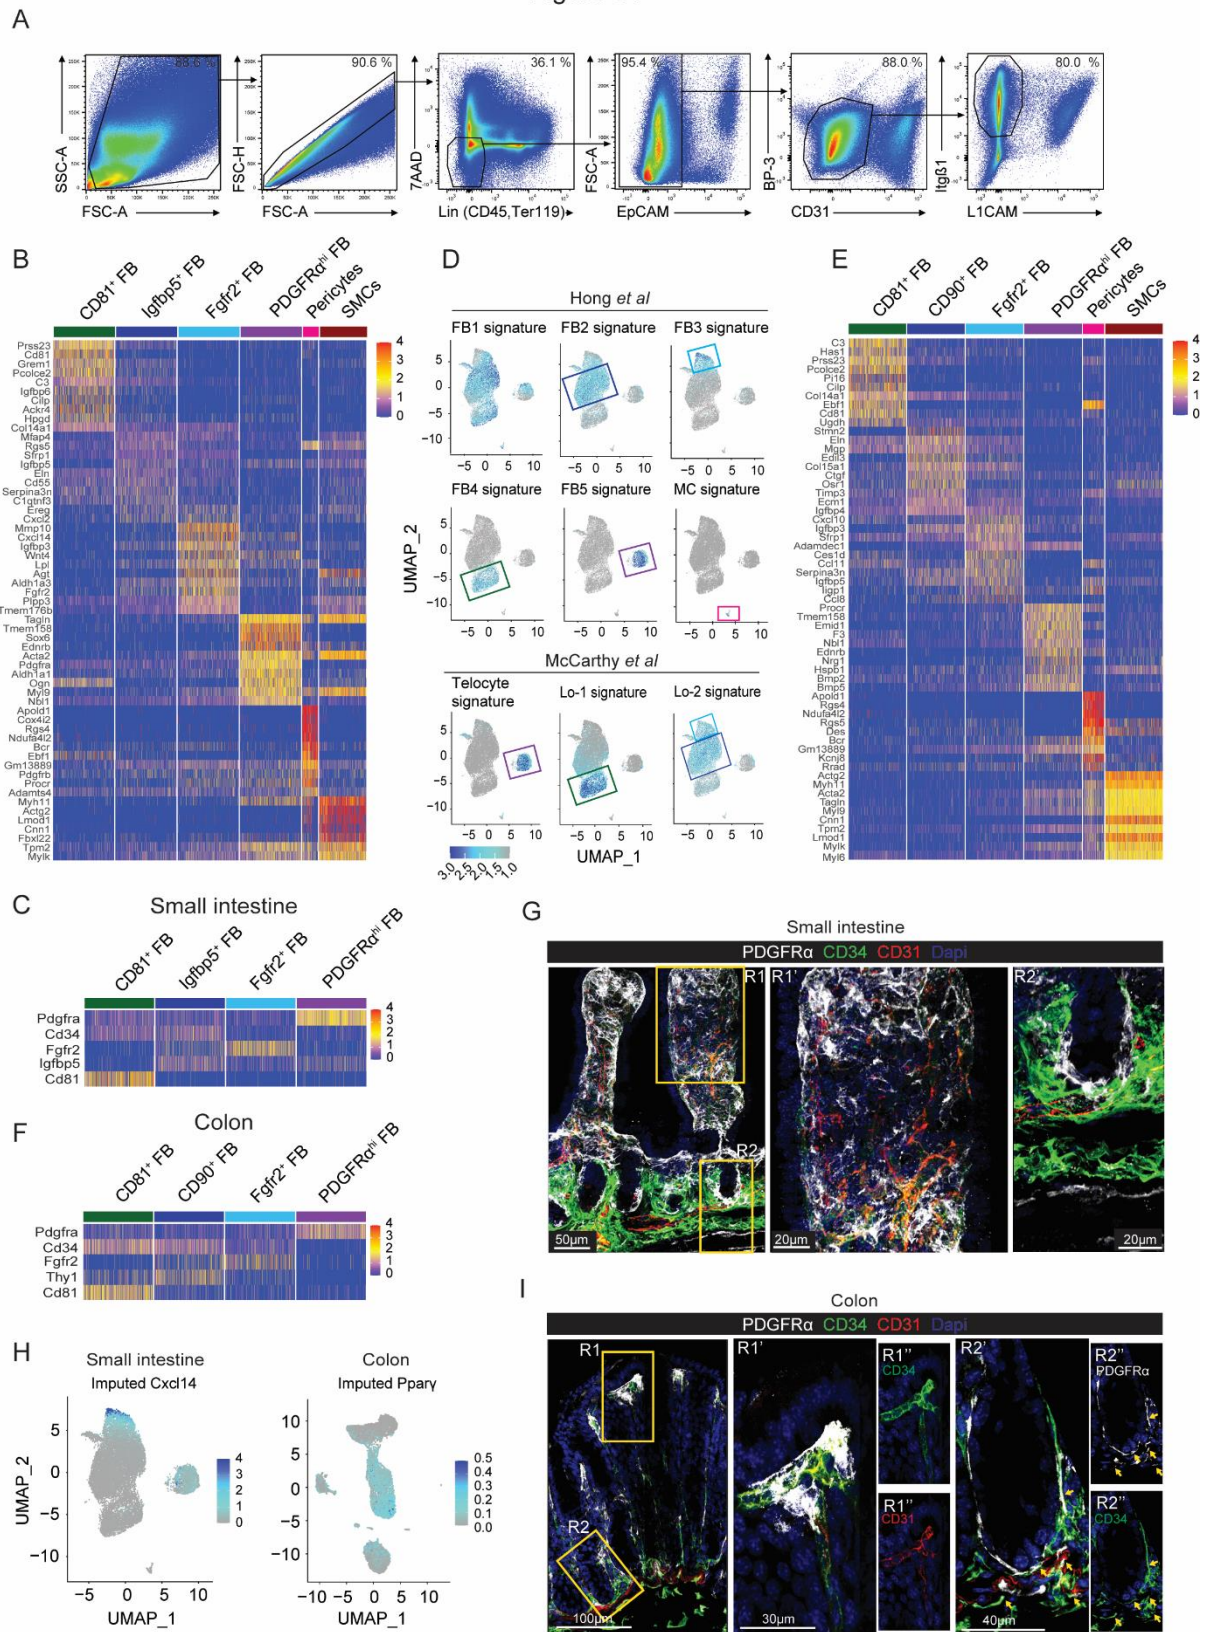

## Figure S1.

Related to Figure 1. **(A)** Flow cytometric gating strategy for sorting adult small intestinal and colonic Itg $\beta$ 1<sup>+</sup> MSC. **(B)** Heatmap with scaled transcription levels (integrated data) of the top 10 differentially expressed genes (DEG) between adult small intestinal MSC subsets. **(C)** Heatmap with scaled transcription levels (anchor integrated data) of markers used to distinguish small intestinal FB subsets. **(D)** Signature genes for MSC subsets identified in Hong *et al* (Hong *et al.*, 2020) and McCarthy *et al* (McCarthy *et al.*, 2020) projected onto the small intestinal MSC UMAP as gene modules. Boxes represent the 6 MSC clusters and are color coded as in **(B)**. **(E)** Heatmap with scaled transcription levels (integrated data) of the top 10 DEGs between adult colonic MSC subsets. **(F)** Heatmap with scaled transcription levels (anchor integrated data) of markers used to distinguish colonic FB subsets. **(G)** Immunohistochemical staining of mouse jejunum. R1' and R2' are high magnifications of the R1 and R2 quadrants (yellow squares) in the left image. **(H)** MAGIC imputed projection of (left) *Cxcl14* expression onto the small intestinal MSC UMAP and (right) *Pparg* expression projected onto the colon MSC UMAP. **(I)** Immunohistochemical staining of mouse colon for indicated antigens. R1'' and R2'' depict single stains. Arrows indicate CD34<sup>+</sup> FB (CD34<sup>+</sup>PDGFR $\alpha$ <sup>+</sup>CD31<sup>-</sup> cells). **(H and I)** Results are representative stains from **(H)** 3 and **(I)** 2 experiments analyzing intestinal sections from 3 mice/experiment.

Figure S2

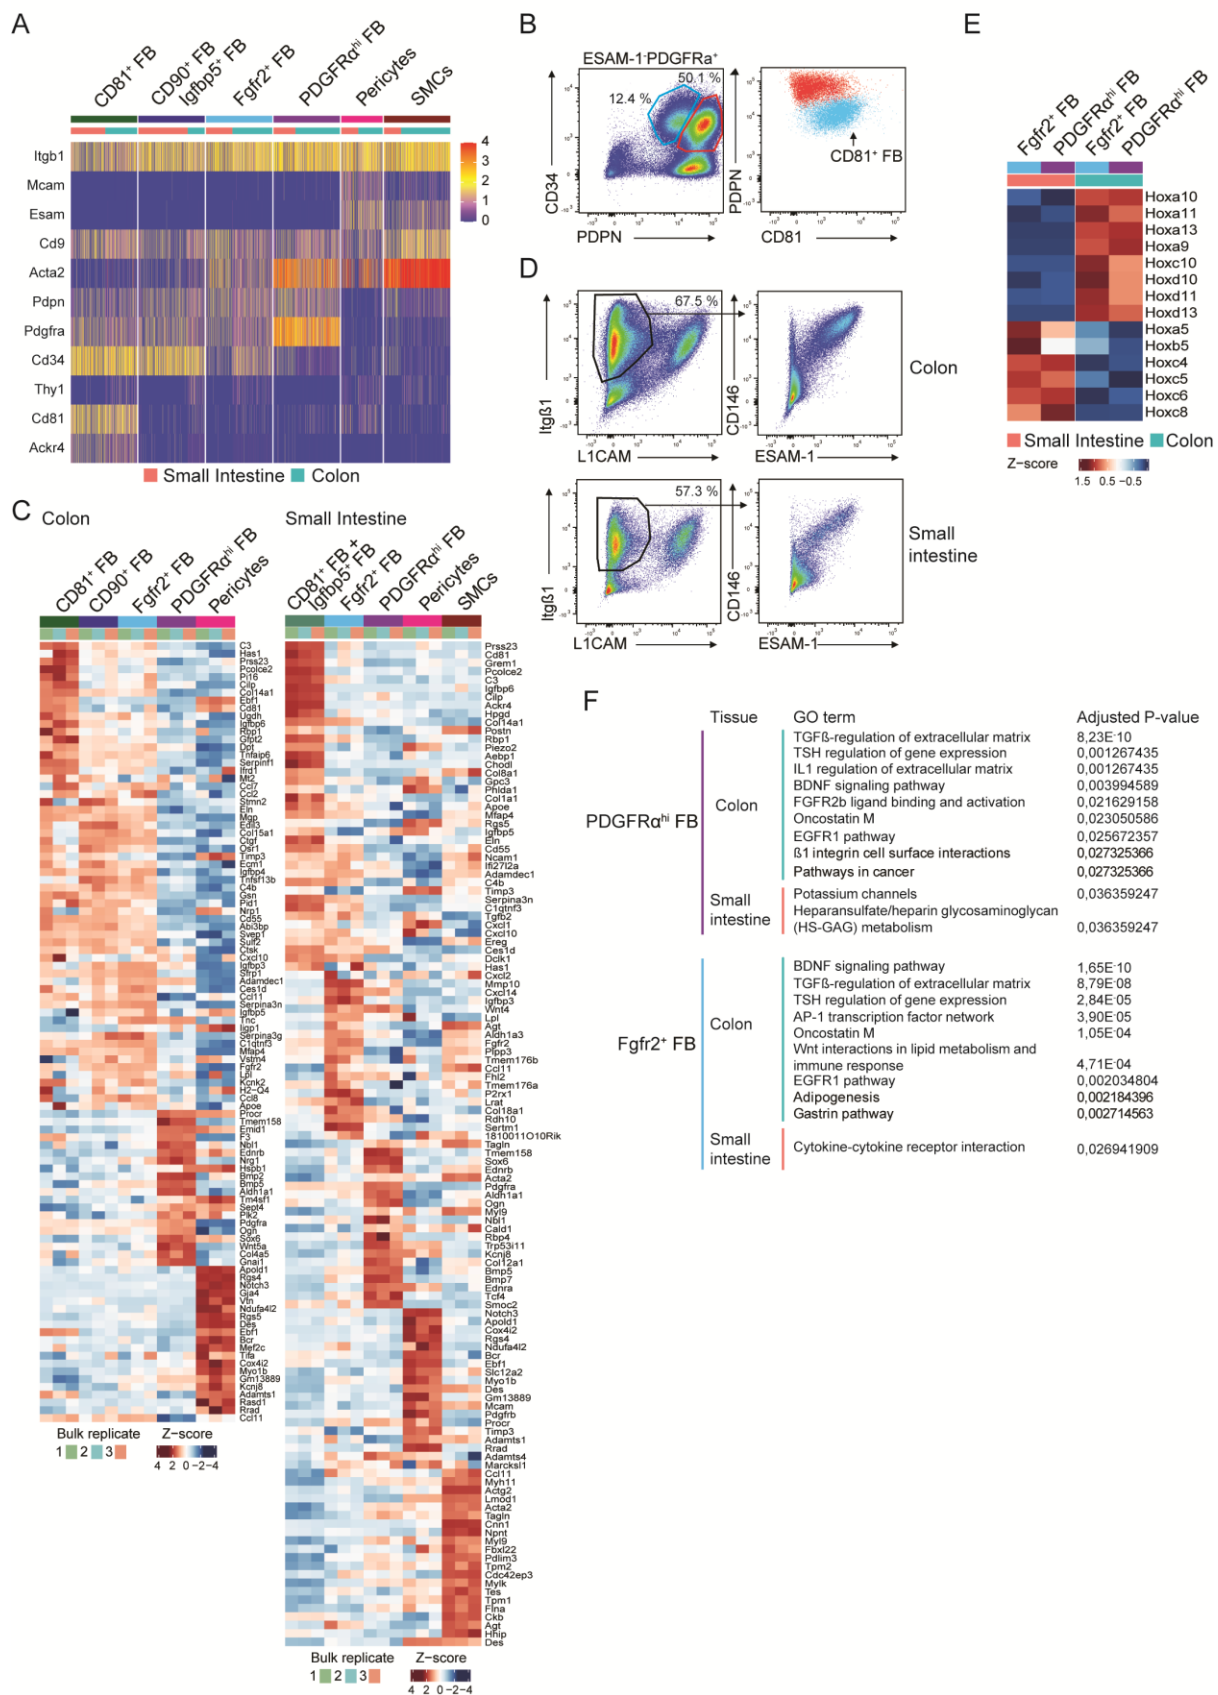

## Figure S2.

Related to Figure 2. (A) Heatmap showing scaled transcription levels (integrated data) of genes used as markers to distinguish the 6 MSC subsets by flow cytometry. (B) Flow cytometric analysis verifying that colonic PDPN<sup>lo</sup>CD34<sup>+</sup>FB (blue gate, left plot) express CD81 (blue cells right plot). Representative gating of at least 3 experiments with 4-7 mice/experiment. (C) Heatmaps showing transcription levels of the top 20 DEGs defining the scRNA-seq subsets within the bulk RNA-seq subsets from colon (left) and small intestine (right). (D) Flow cytometric gating strategy of colon (top panels) and small intestine (bottom panels) showing co-staining of ESAM-1 and CD146 by Itgβ1<sup>+</sup> MSCs. Representative stains of at least 6 experiments with 1 mouse/experiment. (E) Heatmap of transcription levels (averaged between bulk RNA-seq triplicates) of Hox genes that were differentially expressed between small and large intestine in the indicated FB subset. (F) Gene ontology (GO) analysis using Enrichr (Bioplanet 2019) of DEGs between small intestinal and colonic PDGFRα<sup>hi</sup> FB (purple) and between small intestinal and colonic Fgfr2<sup>+</sup> FB (light blue). Top 9 significant pathways based on adjusted p values for colon and all significant pathways for small intestine are shown.



Figure S3

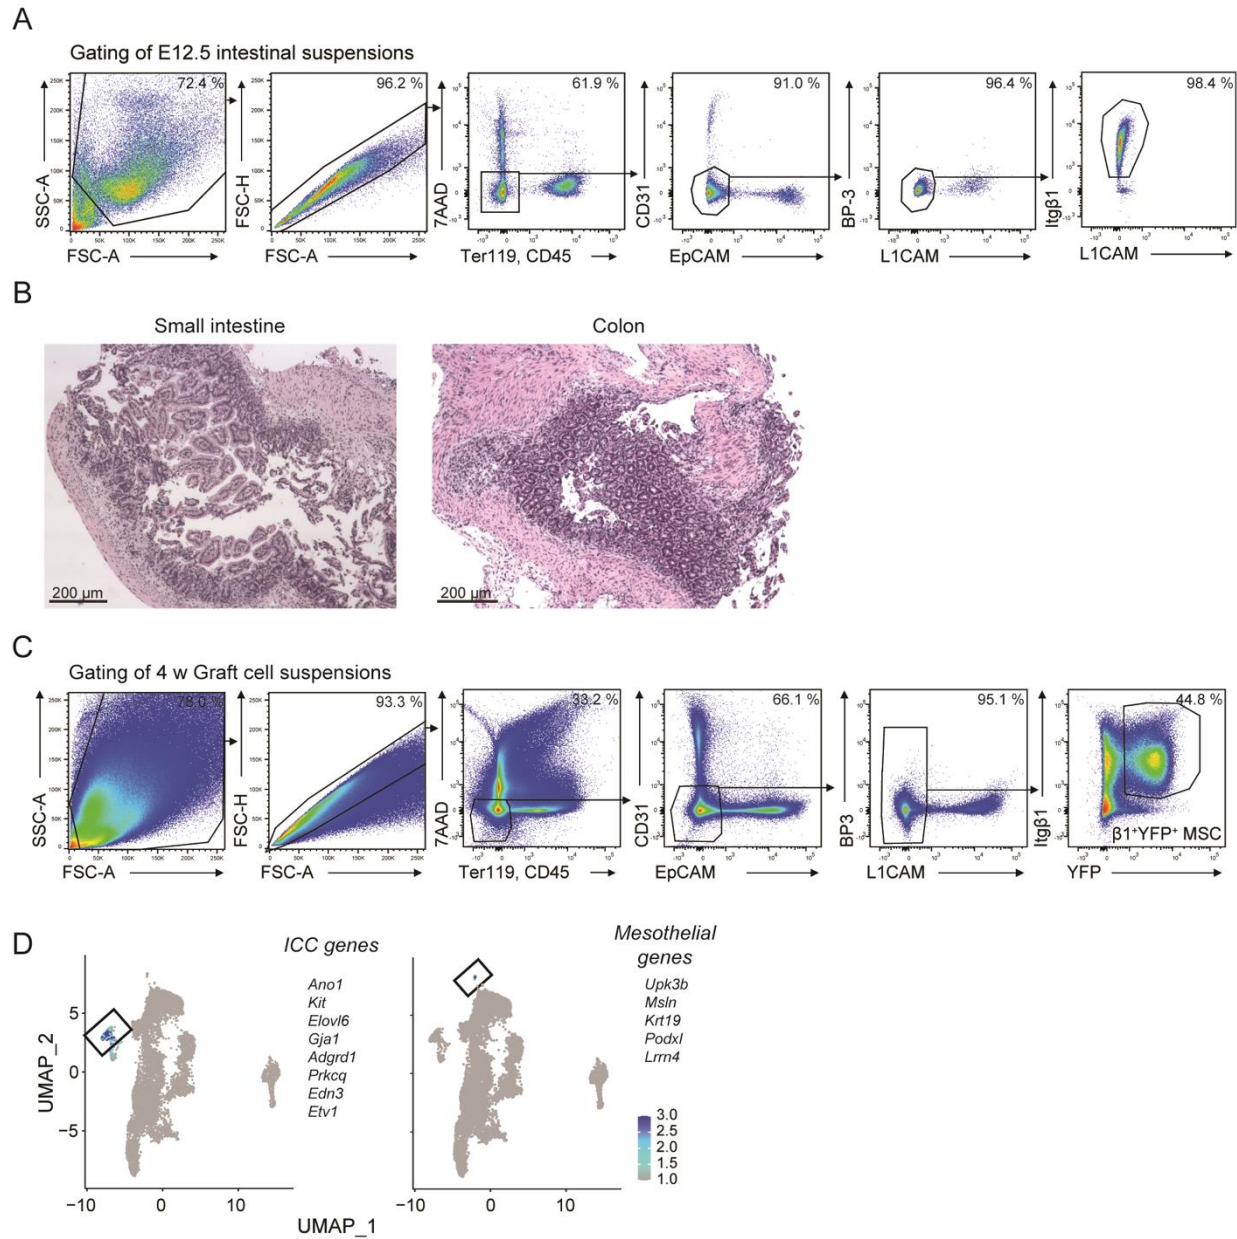

**Figure S3.**

Related to Figure 3. **(A)** Flow cytometric gating strategy for the identification and sorting of intestinal Itgβ1<sup>+</sup> MSC from embryonic day (E)12.5 mice. **(B)** Hematoxylin and eosin staining of small intestinal and colonic grafts 6 weeks post transplantation. Results are representative stains of 2 grafts for each tissue. **(C)** Flow cytometric gating strategy for the identification and

sorting of YFP<sup>+</sup>Itgβ1<sup>+</sup> MSC from intestinal grafts. **(D)** Projections of module score of signature genes for Interstitial cells of Cajal (ICC) and mesothelium onto colon graft UMAP. Boxes identify the ICC and mesothelial clusters.

Figure S4

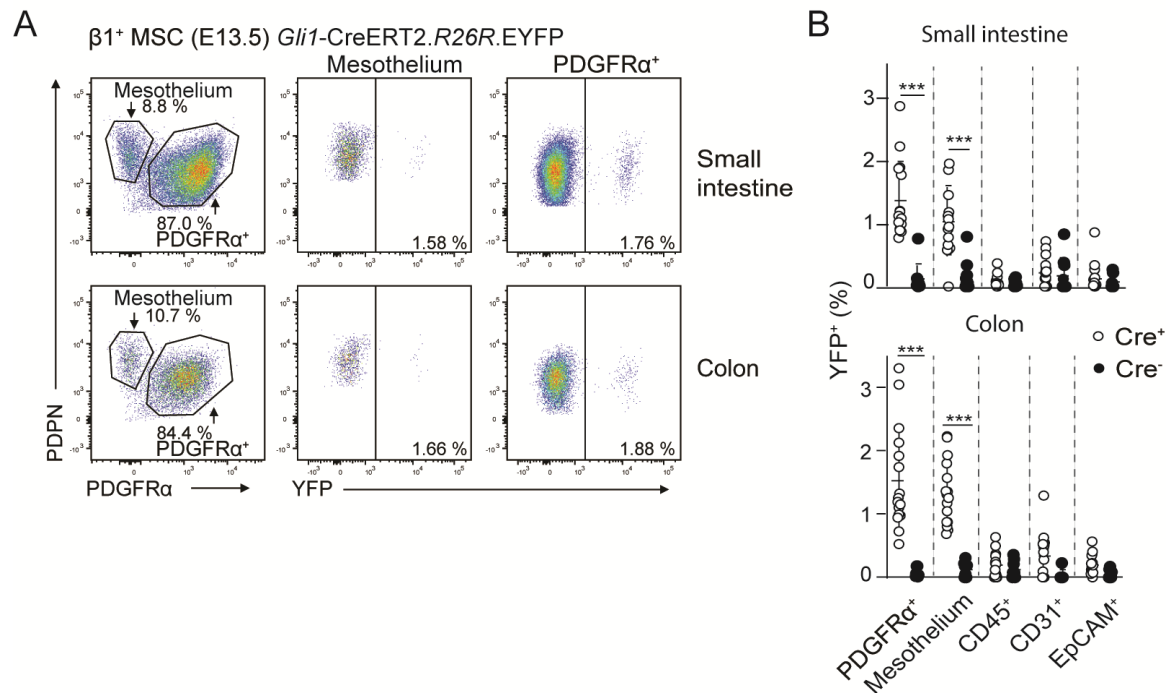

**Figure S4.**

Related to Figure 4. **(A)** Representative flow cytometric analysis and **(B)** pooled data of the proportions of YFP-expressing cells in indicated intestinal populations of E13.5 *Gli1*.CreERT2<sup>+/−</sup>.*R26R*.EYFP mice 2 days after injection with 4-OHT. Pre-gating strategy as in Fig. S3A. Results are from 4 pooled experiments with 1-6 embryos/experiment (SI n=21, LI n=24). Bars, mean (SD). \*\*\*p<0.0001, 2-way ANOVA with Benjamini, Krieger and Yekutieli multiple comparisons.

Figure S5

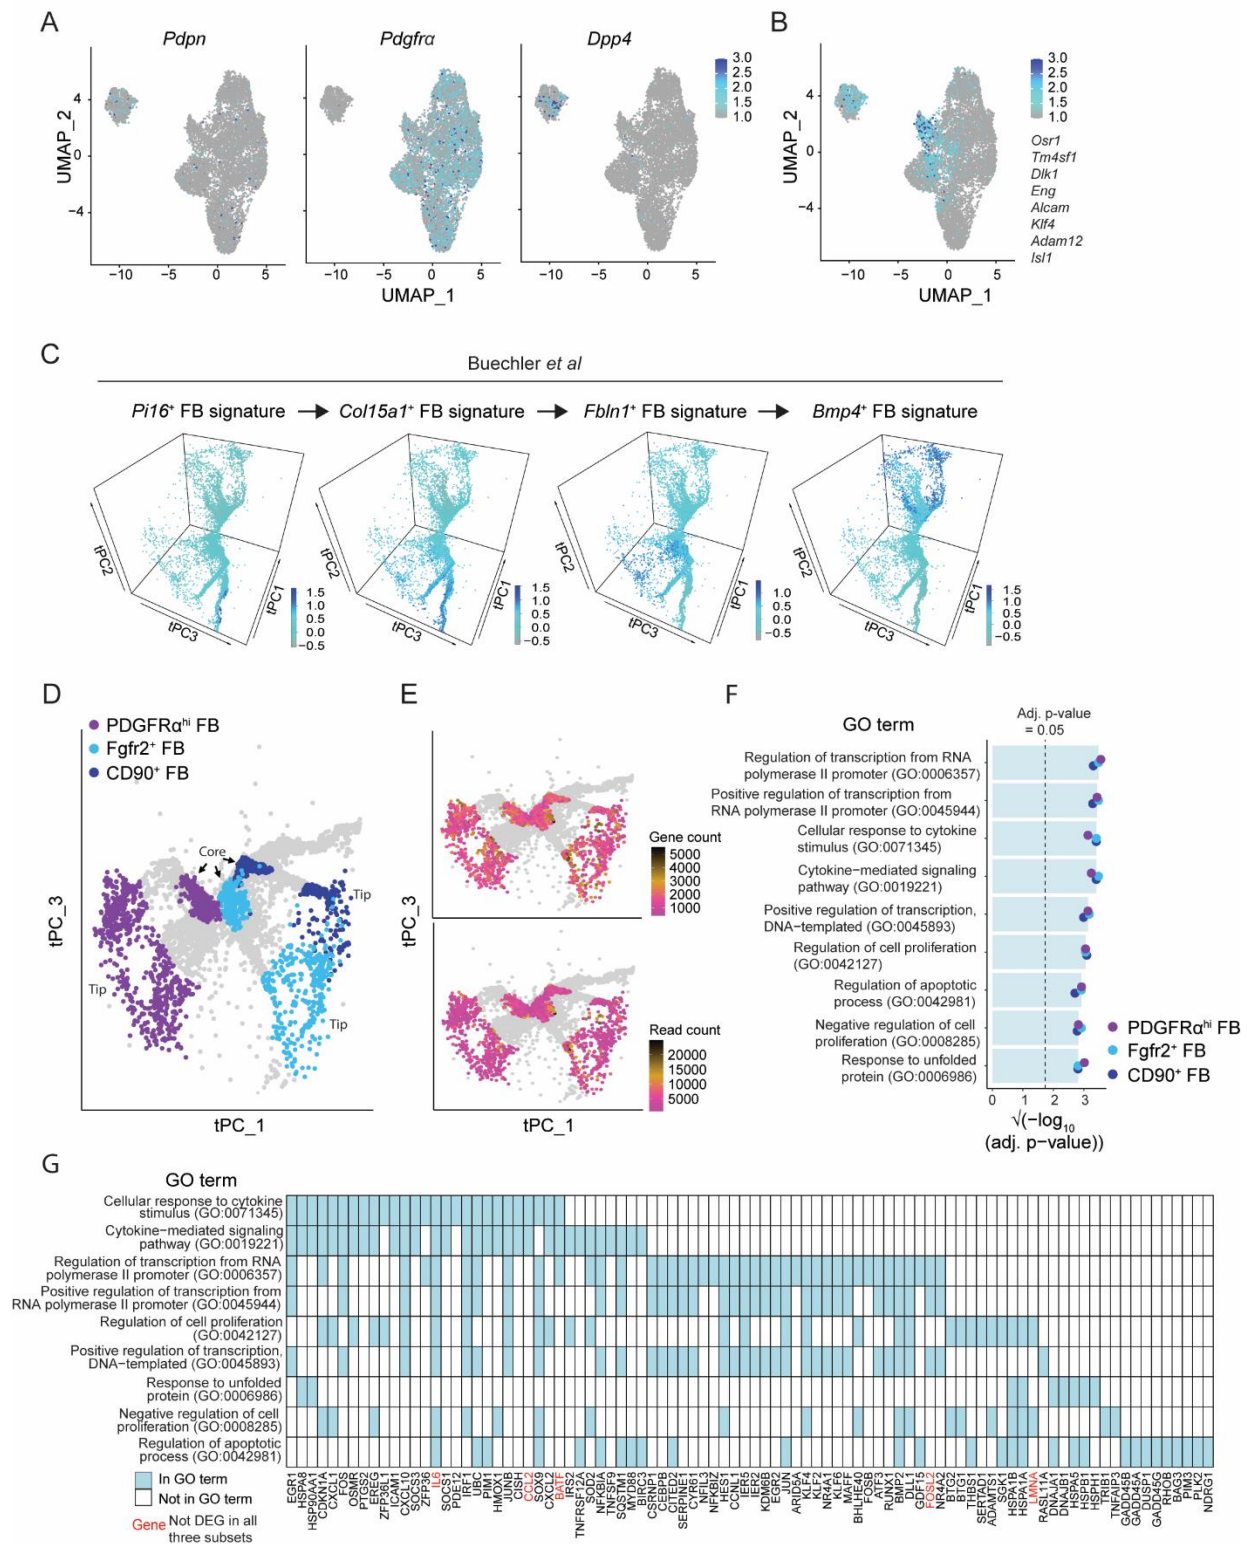

### Figure S5.

Related to Figure 5. (A) *Pdpn*, *Dpp4*, *Pdgfra* integrated and normalized gene expression and (B) mesenchymal precursor associated gene expression module score projected onto UMAP of E12.5 large intestinal Itg $\beta$ 1<sup>+</sup> MSC. (C) Top 20 DEGs for indicated FB clusters identified in Buechler *et al* projected as gene modules onto colonic tSPACE projections of adult colonic MSC in tPC1-3. Arrows indicate predicted trajectory between FB clusters according to Buechler *et al* (Buechler *et al.*, 2021). (D) tSPACE principal component analysis projection (tPC1 and tPC3) of adult colonic FB subsets. Colors represent the indicated FB subsets, where core and tip cells within each FB subset were compared for differential gene expression. (E) tPC1 vs tPC3 projection showing overlaid gene count (top) and read count (bottom) on tip and core cells highlighted in (D). (F) GO term analysis using Enrichr (GO Biological Process 2018) of DEGs enriched in core versus tip cells within each FB subset. The data shown are the 9 GO terms shared by core cells within each FB subset (ranked by adjusted p value). Dotted line denotes significant adjusted p value of 0.05. (G) Discrete heatmap indicating the DEGs accounting for the top 9 processes. Blue squares represent the genes in GO term. White squares represent the genes not in GO term. Genes labelled black are expressed at significantly higher levels in core compared with tip cells within each FB subsets. Genes in red are expressed at significantly higher levels in core cells from 1-2 of the three FB subsets.



Figure S6

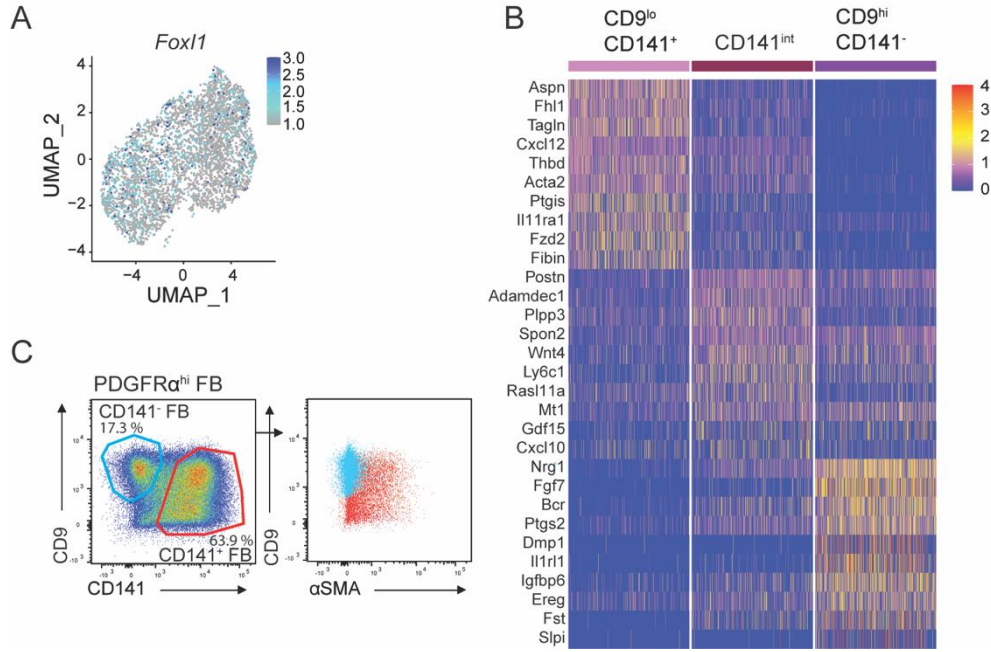

**Figure S6.**

Related to Figure 6. **(A)** Integrated and normalized *Foxl1* expression projected onto UMAP of colonic PDGFRα<sup>hi</sup> FB. **(B)** Heatmap with scaled expression (integrated) of top 10 differentially expressed genes (DEGs) between the three colonic PDGFRα<sup>hi</sup> subsets. **(C)** Flow cytometric analysis of PDGFRα<sup>hi</sup> FB showing expression of αSMA (right hand plot) by CD141<sup>+</sup> (red) and CD141<sup>-</sup> (blue) cells using the gates depicted in the left hand panel. Results are representative staining of 2 experiments with 3 mice/experiment.
